# Supplementary material for: Vitamin D and the Ability to Produce 1,25(OH)2D Are Critical for Protection from Viral Infection of the Lungs
Source: MDPI journal article supplement (doi:10.3390/nu14153061), 2022-07-26
Supplement: s1 [file s1]

**Supplementary Table S1. Primer sequences for qPCR.**

| <b>Target gene</b>            | <b>Forward Primer (5'-3')</b>              | <b>Reverse Primer (5'-3')</b>               |
|-------------------------------|--------------------------------------------|---------------------------------------------|
| <i>Vdr</i>                    | 5'-CTG CAC CTC CTC ATC<br>TGT GA-3'        | 5'-CCC CTT CAA TGG<br>AGA TTG C-3'          |
| <i>Cyp24A1</i>                | 5'-ACC CCC AAG GTC CGT<br>GAC ATC-3        | 5'-CCA GTT GGG TCC<br>AGG TAA GG-3'         |
| <i>Cyp27B1</i>                | 5'-CCG CGG GCT ATG CTG<br>GAA C-3'         | 5'-CTC TGG GCA AAG<br>GCA AAC ATC TGA-3'    |
| <i>Ifn<math>\alpha</math></i> | 5'-GGA CTT TGG ATT CCC<br>GCA GGA GAA G-3' | 5'- GCT GCA TCA GAC<br>AGC CTT GCA GGT C-3' |
| <i>Ifn<math>\beta</math></i>  | 5'-AGG GCG GAC TTC AAG<br>ATC-3'           | 5'-CTC ATT CCA CCC<br>AGT GCT-3'            |
| <i>Ifn<math>\gamma</math></i> | 5'-TGC ATC TTG GCT TGG<br>CAG CTC TTC-3'   | 5'-GGG TTG ACC TCA<br>AAC TTG GCA-3'        |
| H1N1 M gene                   | 5'-AGA TGA GTC TTC TAA<br>CCG AGG TCG-3'   | 5'-TCG AGA TCG GTG<br>TTC TTT CC-3'         |

**Supplementary Table S2. Histological evaluation of SARS-CoV-2 infected mouse.**

| <b>Parameter</b>                                    | <b>Score = 0</b> | <b>Score = 1</b>                 | <b>Score = 2</b>                 | <b>Score = 3</b>          |
|-----------------------------------------------------|------------------|----------------------------------|----------------------------------|---------------------------|
| <b>Perivascular Infiltrates<br/>(0-3)</b>           | None             | Up to 10%<br>vessels<br>affected | Up to 25%<br>vessels<br>affected | ≥ 25% vessels<br>affected |
| <b>Lymphocyte dominant<br/>(0-1)</b>                | No               | Yes                              |                                  |                           |
| <b>Endothelial reactivity<br/>(0-2)</b>             | None             | Any/multi-<br>focal              | Generalized                      |                           |
| <b>Other vascular<br/>parameters<br/>(0-1)</b>      | Absent           | Present                          |                                  |                           |
| <b>Type II pneumocyte<br/>hypertrophy<br/>(0-1)</b> | Absent           | Present                          |                                  |                           |
| <b>Pneumonia extent<br/>(0-3)</b>                   | None             | Minimal,<br>focal                | Minimal,<br>multi-focal          | Mild, multi-focal         |
| <b>Alveolar remodeling<br/>(0-1)</b>                | None             | Any                              |                                  |                           |
| <b>Interstitial pneumonia<br/>(0-3)</b>             | None             | Up to 10%<br>affected            | 10- 25%<br>affected              | ≥ 25% affected            |
| <b>Intra-alveolar<br/>inflammation (0-3)</b>        | None             | Up to 10%<br>affected            | Up to 25%<br>affected            | ≥ 25% affected            |

<sup>1</sup>Histopathology criteria for scoring lung sections of SARS-CoV-2 infected mice.

**Supplementary Table S3. Histological evaluation of SARS-CoV-2 infected.**

| <b>Parameter</b>                                | <b>Score = 0</b> | <b>Score = 1</b>                                                           | <b>Score = 2</b>                                                                | <b>Score = 3</b>                                                          | <b>Score = 4</b> |
|-------------------------------------------------|------------------|----------------------------------------------------------------------------|---------------------------------------------------------------------------------|---------------------------------------------------------------------------|------------------|
| <b>Lesions<br/>(0-4)</b>                        | None             | Up to 25% affected                                                         | 25-50% affected                                                                 | 50-75% affected                                                           | > 75% affected   |
| <b>Alveoli<br/>(0-3)</b>                        | None             | Mild edema and/or infiltrate                                               | Moderate to severe edema or infiltrate                                          | Diffuse alveolar damage                                                   | N/A              |
| <b>Bronchioles<br/>(0-3)</b>                    | None             | Mild peribronchiolar cuffing and/or infiltrate, or epithelial degeneration | Moderate peribronchiolar cuffing and/or infiltrate with epithelial degeneration | Severe peribronchiolar cuffing and/or infiltrate with epithelial necrosis | N/A              |
| <b>Blood vessels<br/>(0-3)</b>                  | None             | Perivascular edema, mild perivascular cuffing                              | Perivascular cuffing in >30% of vessels, minimal vasculitis                     | Vasculitis with thrombosis                                                | N/A              |
| <b>Hemorrhage<br/>(0-2)</b>                     | None             | Mild                                                                       | Severe                                                                          | N/A                                                                       | N/A              |
| <b>Type II pneumocyte hyperplasia<br/>(0-2)</b> | None             | Early change, mild                                                         | Marked change, widespread                                                       | N/A                                                                       | N/A              |

<sup>1</sup>Histopathology criteria for scoring lung sections of SARS-CoV-2 infected hamsters.

**Supplementary Table S4. Histological evaluation of H1N1 infected.**

| <b>Parameter</b>                           | <b>Score = 0</b> | <b>Score = 1</b>                                   | <b>Score = 2</b>                                       | <b>Score = 3</b>                |
|--------------------------------------------|------------------|----------------------------------------------------|--------------------------------------------------------|---------------------------------|
| <b>Total lymphocyte infiltration (0-3)</b> | None             | Some inflammation                                  | < 3 foci of inflammation                               | > 3 foci of inflammation        |
| <b>Perivascular infiltration (0-3)</b>     | None             | Some lymphocytes around bronchiole or blood vessel | Lymphoid aggregates around bronchioles or blood vessel | Multiple lymphoid aggregates    |
| <b>Alveolar Hemorrhage (0-3)</b>           | None             | Few hemorrhagic lesions                            | Multiple lesions                                       | Hemorrhage with alveolar damage |

<sup>1</sup>Histopathology criteria for scoring lung sections of H1N1 influenza infected mice.
